# Supplementary material for: A Genome-Wide Analysis of the BAM Gene Family and Identification of the Cold-Responsive Genes in Pomegranate (Punica granatum L.)
Source: MDPI journal article supplement (doi:10.3390/plants13101321), 2024-05-10
Supplement: s1 [file s1]

## Supplementary figure

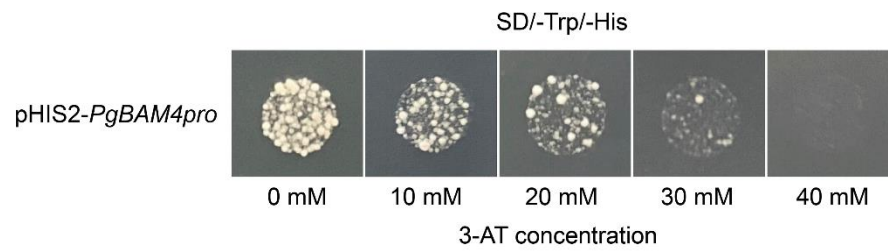

**Figure S1.** Screening of the optimal concentration of 3-AT used for yeast one hybrid assay. The yeast strain Y187 transformed with the pHIS2-*PgBAM4pro* vectors were grown on -Trp/-His medium containing different concentrations of 3-AT.
